# Supplementary material
Source: PubMed Central journal article supplement (PMC6125533)

## Supplemental Figure and Tables

**Table S1. Influence of mucin on MIC.** Liquid MIC results done in SCFM with 0.4% mucin and without mucin grown at 37°C overnight with an inoculum size of  $2-7 \times 10^5$  cells (n=3-5).

| Antibiotic      | MIC ( $\mu\text{g/ml}$ ) |         |
|-----------------|--------------------------|---------|
|                 | + mucin                  | - mucin |
| Gentamicin      | 4                        | 1       |
| Tobramycin      | 2                        | 2       |
| Amikacin        | 16                       | 4       |
| Imipenem        | 0.325                    | 0.625   |
| Meropenem       | 0.125                    | 0.125   |
| Ceftazidime     | 31.25                    | 31.25   |
| Aztreonam       | 4                        | 8       |
| Piperacillin    | 4                        | 4       |
| Erythromycin    | 500                      | 250     |
| Clarithromycin  | 2000                     | 2000    |
| Polymyxin B     | 16                       | 16      |
| Colistin        | 16                       | 2       |
| Norfloxacin     | 16                       | 16      |
| Ciprofloxacin   | 1                        | 0.5     |
| Trimethoprim    | 128                      | 128     |
| Tetracycline    | 64                       | 256     |
| Chloramphenicol | 32                       | 16      |

**Table S2. Resistome mutant susceptibility under surfing conditions - raw data.** Average zone of inhibition measurements for resistome mutants tested against five selected antibiotics. Mutants of up-regulated resistome genes were tested against 10 µg/disk of antibiotic and down-regulated against 100 µg/disk. Statistical significance relative to wild-type was determined using two-way ANOVA. (n=3 resistome mutants; n=6 wild-type) \* p<0.5, \*\* p<0.01, \*\*\* p< 10<sup>-3</sup>, \*\*\*\* p<10<sup>-4</sup>. Standard deviations range from 0 to 2.5mm.

| Mutant                                      | Zone of Inhibition (mm) |              |             |            |             |
|---------------------------------------------|-------------------------|--------------|-------------|------------|-------------|
|                                             | Imipenem                | Tetracycline | Polymyxin B | Tobramycin | Norfloxacin |
| <b>10 µg/disk antibiotic concentration</b>  |                         |              |             |            |             |
| Wild-type                                   | 5.7                     | 5.0          | 5.6         | 3.3        | 1.0         |
| <i>ΔrecG</i>                                | 7.3                     | 8.7*         | 9.7**       | 12.5****   | 7.3****     |
| <i>ΔddaH</i>                                | 9.0*                    | 0***         | 5.3         | 3.0        | 2.3         |
| <i>ΔPA5130</i>                              | 10**                    | 0***         | 0****       | 0*         | 6.5****     |
| <i>cycH</i>                                 | 4.5                     | 4.3          | 11****      | 9.7****    | 0           |
| <b>100 µg/disk antibiotic concentration</b> |                         |              |             |            |             |
| Wild-type                                   | 12.3                    | 6.7          | 8           | 12         | 14.7        |
| <i>ΔarmR</i>                                | 0****                   | 0****        | 1****       | 6.3****    | 0****       |
| <i>ΔPA3576</i>                              | 12.0                    | 3.0*         | 6.0         | 8.3*       | 10.7*       |
| <i>ΔPA1428</i>                              | 12.7                    | 7.7          | 8.0         | 7.0****    | 0.0****     |
| <i>ΔPA2047</i>                              | 12.3                    | 7.0          | 5.7         | 7.3**      | 9.7***      |
| <i>ΔPA1553</i>                              | 9.0                     | 7.3          | 7.7         | 8.0*       | 10.5*       |
| <i>ΔatpB*</i>                               | 9.7                     | 4.0          | 8.0         | 8.3*       | 9.7***      |
| <i>ΔPA4292</i>                              | 7.7**                   | 5.3          | 17****      | 5****      | 10**        |
| <i>ΔclpS</i>                                | 8.3*                    | 6.3          | 15****      | 6.7***     | 8.3****     |
| <i>ΔnuoB</i>                                | 10.7                    | 0****        | 18****      | 6.3****    | 10.3**      |
| <i>ΔPA3721</i>                              | 10                      | 2**          | 14.5****    | 0****      | 10**        |
| <i>ΔPA4429</i>                              | 11                      | 8.7          | 20****      | 0****      | 7.7****     |
| <i>ΔetfA</i>                                | 12.3                    | 9            | 15****      | 7.3**      | 10**        |
| <i>ΔnuoG</i>                                | 9.7                     | 6.5          | 6           | 0****      | 7.3****     |
| <i>ΔPA4781</i>                              | 12.3                    | 10           | 10.3        | 6.7***     | 9****       |
| <i>ΔserA</i>                                | 14.7                    | 8.7          | 12.7**      | 7.3**      | 11*         |
| <i>ΔccmF</i>                                | 14                      | 8.7          | 13.3***     | 7.3**      | 8.7****     |
| <i>ΔPA3667</i>                              | 15.7                    | 0.0****      | 7.7         | 10.0       | 12.0        |
| <i>ΔPA1513</i>                              | 10.7                    | 0.0****      | 7.3         | 10.7       | 14.0        |
| <i>ΔpchF</i>                                | 9.7                     | 5.0          | 7.3         | 1.1****    | 13.3        |
| <i>Δrph</i>                                 | 13.0                    | 9.0          | 6.0         | 5.0****    | 15.0        |
| <i>ΔPA2566</i>                              | 11.0                    | 4.0          | 7.0         | 9.3        | 9.7***      |
| <i>ΔgidA</i>                                | 9.7                     | 7.3          | 9.0         | 10.5       | 10.0**      |
| <i>ΔmutS</i>                                | 16.0                    | 9.3          | 4.3*        | 6.3****    | 11.5        |
| <i>ΔthiG</i>                                | 6.3****                 | 6.7          | 7.0         | 8.7        | 10.3**      |
| <i>ΔnuoF</i>                                | 11.0                    | 5.3          | 6.7         | 7.0***     | 14.7        |
| <i>ΔpckA</i>                                | 9.7                     | 4.8          | 7.0         | 6.3****    | 12.0        |
| <i>ΔPA2571</i>                              | 12.7                    | 6.7          | 7.0         | 7.3**      | 11.7        |

|                |        |     |     |        |       |
|----------------|--------|-----|-----|--------|-------|
| <i>ΔPA4766</i> | 13.7   | 6.0 | 6.5 | 7.0*** | 13.7  |
| <i>ΔPA1348</i> | 16.7** | 5.5 | 8.3 | 10.7   | 10.7* |
| <i>ΔbraB</i>   | 11.0   | 6.7 | 5.7 | 10.0   | 10.7* |
| <i>ΔhtpX</i>   | 12.7   | 5.7 | 8.3 | 11.0   | 9.5** |
| <i>ΔspeA</i>   | 11.3   | 4.5 | 5.3 | 10.3   | 12.0  |
| <i>ΔadhA</i>   | 12.3   | 7.0 | 6.7 | 10.3   | 13.3  |

**Table S3. RT-qPCR results confirmed the dysregulation of resistome genes shown in RNA-Seq.** The relative fold-change of expression of select resistome genes under surfing conditions (SCFM + 0.4% mucin) relative to swimming (SCFM 0.3% agar) from both the RNA-Seq experiment and RT-qPCR of cells collected from the centre and edge of a surfing colony relative to swimming cells. (FC cut-off of RNA-Seq is  $\pm 1.5$ ).

| Gene          | Gene Expression (FC) |      |        |      |
|---------------|----------------------|------|--------|------|
|               | RT-qPCR              |      | RNASeq |      |
|               | Centre               | Edge | Centre | Edge |
| <i>recG</i>   | 16.4                 | 8.1  | 1.9    | 2.1  |
| <i>PA5130</i> | 2.2                  | 1.5  | NC     | 2.4  |
| <i>ddaH</i>   | 2.8                  | 3.2  | 4.9    | 2.4  |
| <i>PA1428</i> | -2.2                 | -3.3 | -3.4   | NC   |
| <i>PA2047</i> | 3.1                  | -1.4 | NC     | -2.1 |
| <i>thiG</i>   | -2.5                 | 1.8  | -2.9   | NC   |
| <i>PA3667</i> | -1.2                 | -3.4 | -1.7   | -2.5 |
| <i>PA3576</i> | 2.3                  | -4.4 | NC     | -2.9 |
| <i>atpB</i>   | -1.5                 | 1.1  | -2.1   | NC   |
| <i>PA4292</i> | -2.3                 | -2.4 | -6.7   | NC   |
| <i>nuoB</i>   | -1.0                 | -1.2 | -2.8   | NC   |
| <i>PA3721</i> | -2.0                 | 2.1  | -5.3   | -2.7 |
| <i>clpS</i>   | 5.0                  | -3.8 | NC     | -2.3 |
| <i>armR</i>   | -4.4                 | 2.9  | -3.2   | -5.1 |
| <i>cycH</i>   | 5.7                  | 1.4  | NC     | 2.2  |

**Table S4. Primers used in this study.** Primers used for PCR amplification are denoted as F (forward) and R (reverse). All primers used for quantitative PCR (qPCR) are denoted as qF (forward) and qR (reverse).

| <b>Primer Name</b> | <b>Sequence (5'-3')</b>   |
|--------------------|---------------------------|
| armR_F             | AGCGTGGCGCCGGAC           |
| armR_R             | CTGCGCGGATTCTGATAGCTCA    |
| armR_qF            | CTGAACACTCCGCGCAACAA      |
| armR_qR            | GTGTAATCCCGCCGACCGAC      |
| atpB_F             | GCTTCGGGTTACATCCAGCA      |
| atpB_R             | CGGCGATAGCAGTCAGTCC       |
| atpB_qF            | TGAAGATGAAGGCCTGCAGG      |
| atpB_qR            | TCGGTAGCGGAATGTTCTTG      |
| clpS_F             | TTGCAGTTAGTCAAGGCGCT      |
| clpS_R             | AAGGCGAGATTGAGGGTGAC      |
| clpS_qF            | TCAATCAGGACCATCCCGAG      |
| clpS_qR            | AACGGTGGCGGCTGTAATAC      |
| cycH_qF            | TAGACAACGGTTTGCCGCGT      |
| cycH_qR            | CAGCTCAAGCTCAGCGGATT      |
| ddaH_F             | CGATTTATCAAGGATTTCCAAGGCA |
| ddaH_R             | CCTCCGAAACTGCATCCG        |
| ddaH_qF            | ATCATCGAGGAGACCGTGCA      |
| ddaH_qR            | TGGTCGCCGACCATCATGAT      |
| nuoB_qF            | CGCGTTTCAGGTCTTTCTGG      |
| nuoB_qR            | TGCTGCTGCAGGAATCCATC      |
| PA1428_F           | GCGACTGAAGCGTACATGCC      |
| PA1428_R           | ACTTCACCCGTTTCTTCAAGC     |
| PA1428_qF          | TTCTGCTTCTGCAACTCGGC      |
| PA1428_qR          | AAGATCCGCCGCTACATTCC      |
| PA2047_F           | CTTGCCCATTCGTGCCGAT       |
| PA2047_R           | TGTATTGCAAGCGCCCC         |
| PA2047_qF          | AAGGTGCCGATTTCCACGTC      |
| PA2047_qR          | AACGCTACCTGGTGATGTCG      |
| PA3576_F           | CCGTCCCGACTTGTCCCG        |
| PA3576_R           | CGAAACGCCACCTTCGTGC       |
| PA3576_qF          | TTGCAGGTTGCCGACCAGTT      |
| PA3576_qR          | ATCGGCTATGCGGTGCTGAA      |
| PA3667_F           | ACCCTTTCCCCTGTAACCGT      |
| PA3667_R           | TGTTCCCAACTGGCGGTG        |
| PA3667_qF          | GAAGCAGGTTGGCATGGTGT      |
| PA3667_qR          | ACAGAGGCGATCAACCTGGT      |
| PA3721_F           | GCTCTCAGCAAACCGCCT        |
| PA3721_R           | CGAGATCCACCTACCGATCT      |

|           |                       |
|-----------|-----------------------|
| PA3721_qF | TCCAGGTAGCAGGCGATGAT  |
| PA3721_qR | AAGGCCGACCTGTTTCCTCAA |
| PA4292_qF | GTTTCGATCTTTTCAGCGGGC |
| PA4292_qR | CGTGGAAGCCGTTGATGAAC  |
| PA5130_qF | ATGGCGTCGACCAGGATGAT  |
| PA5130_qR | ACATCGTCGACGCGCTGAAC  |
| recG_F    | GTCCACGCGCCATCGAA     |
| recG_R    | CAAGACTGAGACCTACGCCG  |
| recG_qF   | CTGGAGATCTACCATCCGGA  |
| recG_qR   | TGGGTGAGTCCTTCGGTAGT  |
| thiG_F    | GATCGTCCACGCCATCGG    |
| thiG_R    | CGCCCCAGGTAGTCGGTAT   |
| thiG_qF   | TGAGCCAAGCATCCAGTACC  |
| thiG_qR   | GTCTCGTCGAGGTCCTTGTA  |

**Table S5. Concentrations of the antibiotics in the disk diffusion assay including their solvents.** Ten  $\mu\text{L}$  of antibiotics was added per disk and dried prior to application onto agar surfaces. MeOH – methanol. DMSO – dimethyl sulfoxide.

| <b>Antibiotic</b> | <b>Concentration (<math>\mu\text{g}/\text{disk}</math>)</b> | <b>Solvent</b> |
|-------------------|-------------------------------------------------------------|----------------|
| Gentamicin        | 10                                                          | Water          |
| Tobramycin        | 10                                                          | Water          |
| Amikacin          | 5                                                           | Water          |
| Imipenem          | 10                                                          | Water          |
| Meropenem         | 5                                                           | Water          |
| Ceftazidime       | 5                                                           | Water          |
| Aztreonam         | 30                                                          | Water          |
| Erythromycin      | 1000                                                        | MeOH           |
| Clarithromycin    | 500                                                         | Water          |
| Polymyxin B       | 10                                                          | Water          |
| Colistin          | 10                                                          | Water          |
| Norfloxacin       | 5                                                           | Water          |
| Ciprofloxacin     | 10                                                          | Water          |
| Trimethoprim      | 1000                                                        | DMSO           |
| Tetracycline      | 10                                                          | MeOH           |
| Chloramphenicol   | 5                                                           | Water          |

**Fig S1. Disk diffusion assay plate set-up.** Mid-log phase ( $OD_{600}=0.4-0.5$ ) cultures are inoculated at 1uL around the antibiotic disk at equal distances. Four-point inoculation was used for swim and surf antibiotic disk assays. Disk diffusion control assays were done using a bacterial lawn spread with 50uL of mid-log phase culture and dried antibiotic disks were applied to the centre of each plate.

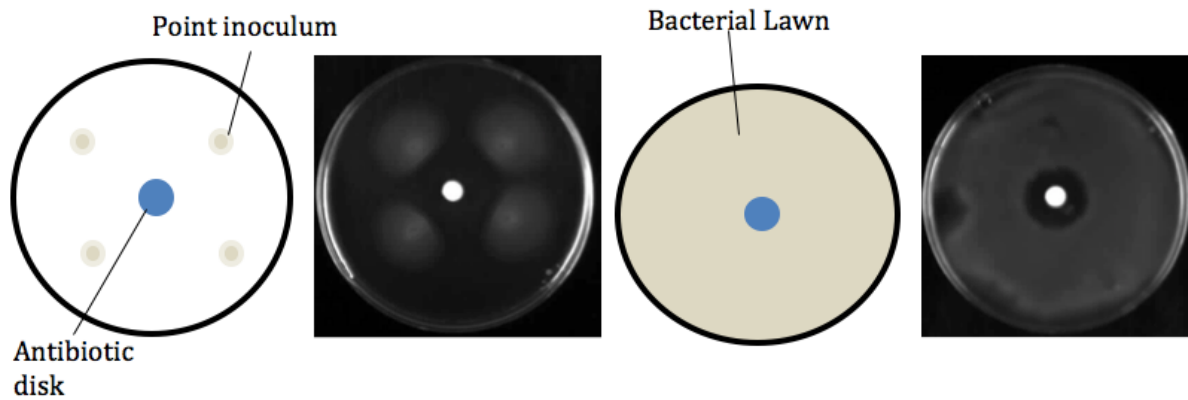

Supplement: zac009187442s1.pdf [file zac009187442s1.pdf]
